# Supplementary material
Source: publisher figshare collection journal article supplement (https://acs.figshare.com/ndownloader/files/5812032)

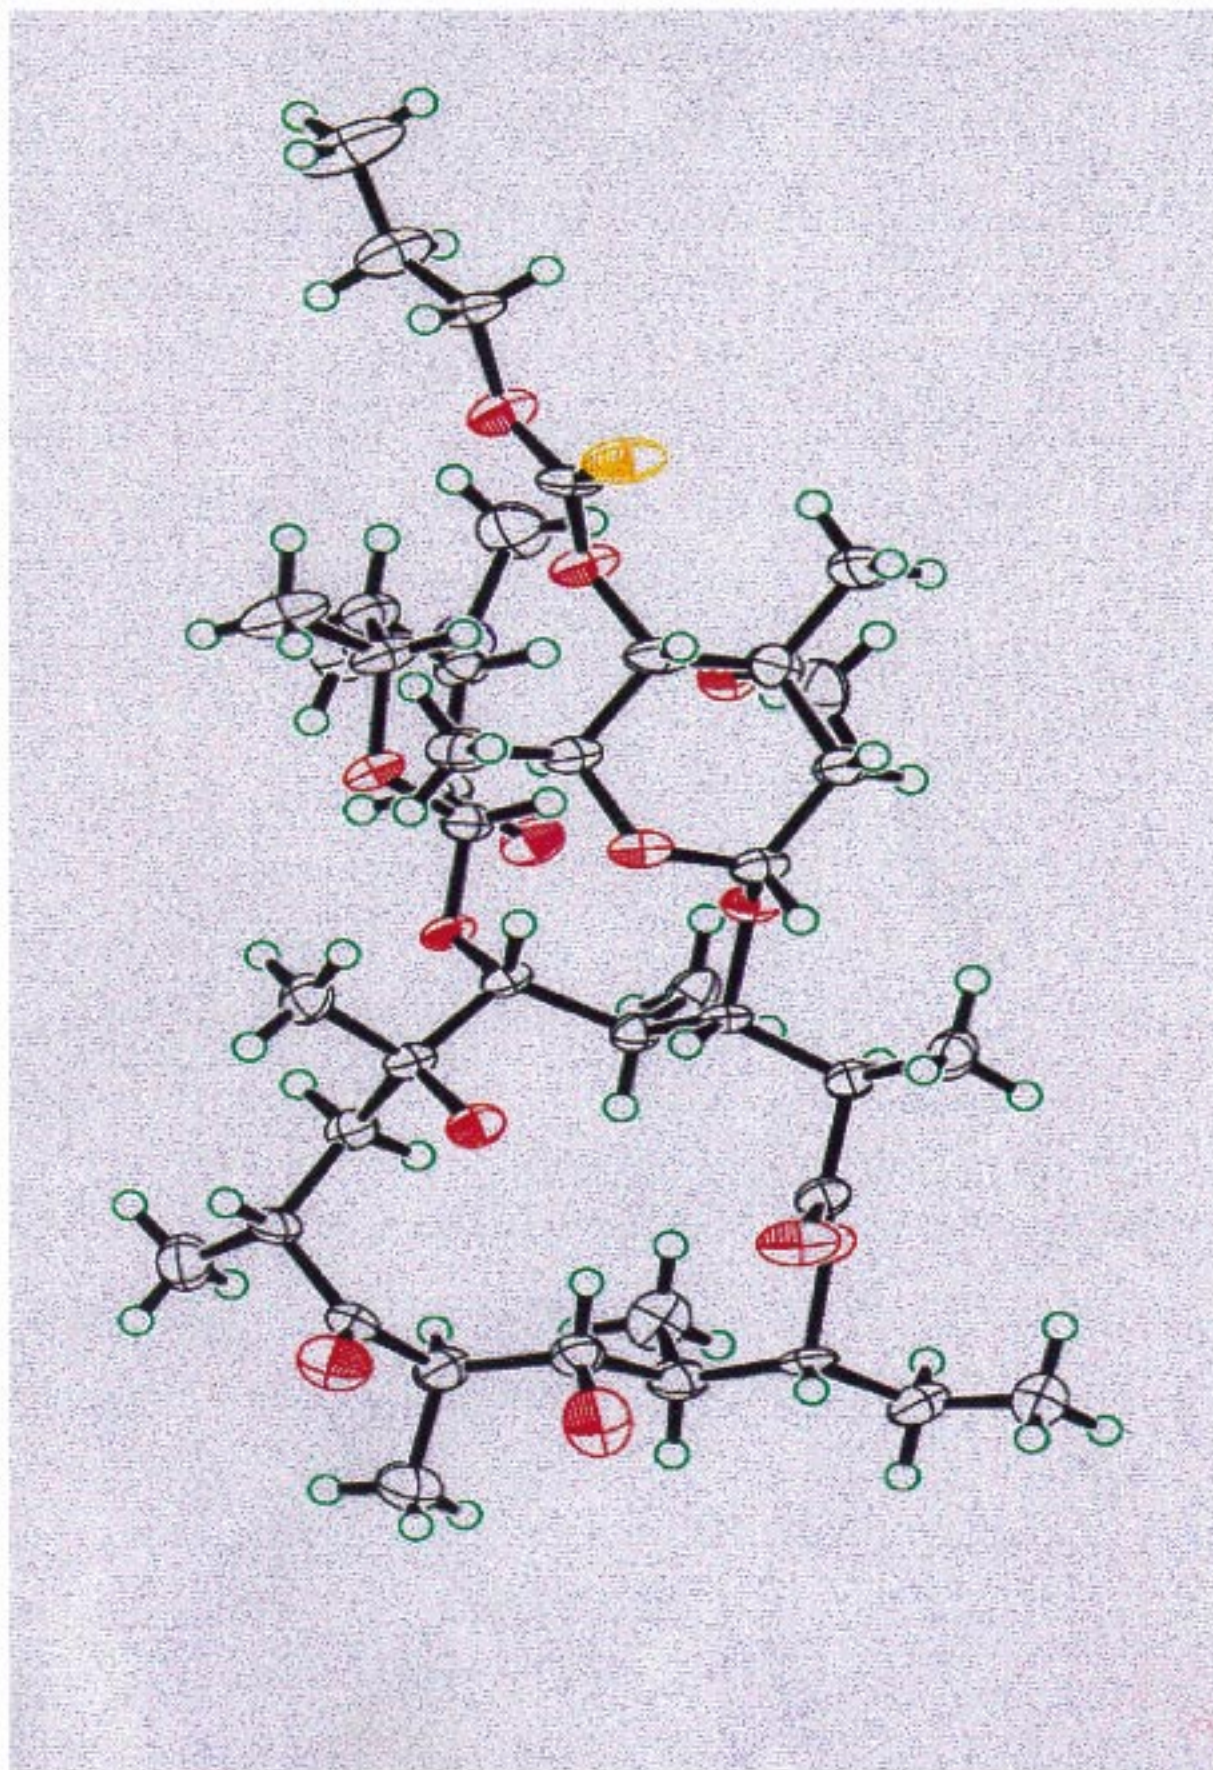

Supplement: Supplementary file 1 [file 5812032]
